# Supplementary material
Source: PubMed Central journal article supplement (PMC3525817)
Supplement: supp_djs461_jnci_JNCI_12_0190_s01.pdf [file supp_djs461_jnci_JNCI_12_0190_s01.pdf]

**Supplementary Table 1.** Median (10<sup>th</sup>–90<sup>th</sup> percentile) recalibrated circulating carotenoid levels (µg/dL) among control subjects\*

| Cohort       | α-carotene     | β-carotene       | β-cryptoxanthin | Lutein+zeaxanthin | Lycopene         | Total carotenoids  |
|--------------|----------------|------------------|-----------------|-------------------|------------------|--------------------|
| Columbia, MO | 4.6 (1.6–11.4) | 17.2 (6.7–35.5)  | 7.9 (4.5–15.4)  | 20.3 (11.5–37.5)  | 20.0 (9.5–38.9)  | 77.7 (43.2–121.9)  |
| Umea         | 8.9 (3.4–22.2) | 27.4 (13.0–63.4) | 12.2 (5.3–30.3) | 20.9 (13.3–33.3)  | 18.1 (7.0–34.5)  | 94.3 (60.1–161.4)  |
| CLUE I       | 3.7 (2.2–8.6)  | 19.2 (9.3–39.0)  | 6.8 (2.5–19.0)  | 18.4 (10.5–34.8)  | 33.4 (21.1–53.0) | 88.6 (56.4–138.8)  |
| CLUE II      | 4.9 (2.9–10.2) | 18.3 (10.2–44.3) | 9.2 (3.4–18.6)  | 18.1 (12.9–31.9)  | 35.4 (21.7–51.1) | 94.5 (66.1–130.0)  |
| NHS          | 7.9 (2.8–19.8) | 23.6 (9.0–63.8)  | 11.5 (5.7–22.2) | 25.3 (13.9–43.9)  | 42.2 (22.8–69.1) | 115.7 (65.4–195.0) |
| WHS          | 6.5 (3.5–14.5) | 19.0 (10.3–43.5) | 9.0 (4.0–19.7)  | 20.6 (12.6–34.1)  | 35.7 (21.8–56.9) | 90.9 (61.6–151.3)  |
| NYUWHS       | 7.5 (2.7–23.5) | 26.1 (8.6–76.6)  | 12.2 (6.7–22.2) | 29.2 (16.7–51.2)  | 32.8 (16.9–56.3) | 119.5 (59.3–213.9) |
| SWHS         | 2.3 (1.0–5.2)  | 22.2 (5.4–48.9)  | 9.9 (4.3–34.0)  | 38.0 (25.2–56.2)  | 10.7 (4.9–30.1)  | 93.3 (64.4–137.0)  |
| MEC          | 6.3 (1.3–16.3) | 21.4 (5.5–62.0)  | 18.0 (5.9–54.5) | 24.1 (13.0–40.7)  | 30.6 (21.7–46.2) | 99.3 (45.3–188.1)  |

\*To convert µg/dL to µmol/L, multiply by the following factors: 0.01863 for α-carotene, β-carotene, and lycopene; 0.01810 for β-cryptoxanthin; 0.01758 for lutein+zeaxanthin. NHS=Nurses' Health Study; WHS=Women's Health Study; NYUWHS=New York University Women's Health Study; SWHS=Shanghai Women's Health Study; MEC=Multiethnic Cohort Study.
